# Supplementary material
Source: HighWire-hosted journal article supplement (https://openres.ersjournals.com/content/7/3/00055-2021)
Supplement: inline-supplementary-material-2 [file inline-supplementary-material-2.docx]

**Online Supplement**

**Detection and diagnosis of large airway collapse: A systematic review**

Mitropoulos A1, Song WJ3, Almaghlouth F2, Kemp S1,2, Polkey MI1,2, Hull JH1,2

**1**Department of Respiratory Medicine, Royal Brompton Hospital, London, UK.

2National Heart and Lung Institute, Imperial College, London, UK.

3Department of Allergy and Clinical Immunology, Asan Medical Centre, University of Ulsan College of Medicine, Seoul, Korea

Correspondence to:

James H. Hull, FRCP, PhD. Department of Respiratory Medicine, Royal Brompton and Harefield NHS Foundation Trust, London, SW3 6HP, UK. E-mail: [j.hull@rbht.nhs.uk](mailto:j.hull@rbht.nhs.uk)

**e-Table 1. Search strategy**

| Pubmed |
| --- |
| 1. "airway collapse"[TIAB] OR "airway collapsibility"[TIAB] OR "bronchial collapse"[TIAB] OR "bronchial collapsibility"[TIAB] OR "tracheal collapse"[TIAB] OR "tracheal collapsibility"[TIAB] OR "expiratory collapse"[TIAB] OR "expiratory tracheal narrowing"[TIAB] OR TM[TIAB] OR tracheobronchomalacia[TIAB] OR bronchomalacia[TIAB]  2. (("Tracheobronchomalacia"[Mesh]) OR "Bronchomalacia"[Mesh]) OR "TM"[Mesh]  3. 1 OR 2  4. 3 Filters: Publication date from 1989/01/01 to 2019/12/31; English |
| Embase |
| 1. 'airway collapse':ab,ti OR 'airway collapsibility':ab,ti OR 'bronchial collapse':ab,ti OR 'bronchial collapsibility':ab,ti OR 'tracheal collapse':ab,ti OR 'tracheal collapsibility':ab,ti OR 'expiratory collapse':ab,tiOR 'expiratory tracheal narrowing':ab,ti OR TM:ab,ti OR tracheobronchomalacia:ab,ti OR bronchomalacia:ab,ti  2. 'airway collapse'/exp OR 'tracheal collapse'/exp OR 'TM'/exp OR 'TM'/exp OR 'tracheobronchomalacia'/exp  3. 1 OR 2  4. 3 AND [1989-2019]/py AND [english]/lim  5. 4 NOT 'nonhuman'/de |

**e-Table 2. Quality assessment**

| **Study** | **Prospective recruitment** (0: no; 1: yes) | **Sample size justification**  (0: no; 1: yes) | **Sample representativeness**  (0: recruited at a single centre; 1: recruited at multiple centres; 2: recruited from general populations) | | | **Risk of selection bias**  (0: recruited for suspected large airway collapse; 1: recruited for respiratory symptoms; 2: unselected recruitment; 9: unclear) | **Description of exclusion criteria**  (0: no; 1: yes) | **Outcome definition (large airway collapse)**  (0: no specific criteria presented; 1: specific criteria) | | |
| --- | --- | --- | --- | --- | --- | --- | --- | --- | --- | --- |
| **LAC studies with healthy volunteers** | | | | | | | | | | |
| Leong et al. 20171 | 1 | 0 | 2 | | 9 | | 1 | 1 | |
| Dal Negro et al. 20132 | 0 | 0 | 0 | | 2 | | 0 | 1 | |
| O’Donnell et al. 20123 | 1 | 1 | 2 | | 2 | | 1 | 0 | |
| McDermott et al. 20094 | 1 | 0 | 0 | | 2 | | 1 | 1 | |
| Heussel et al. 20045 | 1 | 0 | 0 | | 2 | | 0 | 1 | |
| **LAC studies with COPD patients** | | | | | | | | | | |
| Leong et al. 20171 | 1 | 0 | 0 | 1 | | | 1 | 1 |
| Sindhwani et al. 20166 | 1 | 0 | 0 | 0 | | | 1 | 1 |
| El Sorougi et al. 20167 | 1 | 0 | 0 | 0 | | | 0 | 1 |
| Represas-Represas et al. 20158 | 1 | 0 | 0 | 0 | | | 1 | 1 |
| O’ Donnell et al. 20149 | 1 | 0 | 0 | 0 | | | 1 | 0 |
| Boiselle et al. 201210 | 1 | 0 | 1 | 0 | | | 1 | 1 |
| Heussel et al. 20045 | 1 | 0 | 0 | 1 | | | 0 | 1 |

**e-Table 3. Summary of 5 studies reporting the prevalence of large airway collapse in healthy subjects**

| **Study** | **Study design** | **Study subjects** | **Diagnostic modality** | **Diagnostic threshold for large airway collapse** | **Prevalence of large airway collapse** |
| --- | --- | --- | --- | --- | --- |
| Dal Negro et al. 20132 | Prospective, single centre | n=62, non-smokers without any obstructive disease | Bronchoscopy | >75% | 1.6% |
| Leong et al. 20171 | Prospective, single centre | n=53, subjects with no respiratory symptoms, no prior diagnosis of chest disease, and not taking any respiratory medications | CT | >50% | 0% |
| O’Donnell et al. 20123 | Prospective, single centre | n=81, lifetime non-smokers, no respiratory symptoms or known respiratory disease | CT | >50% | 56% |
| McDermott et al. 20094 | Prospective, single centre | n=10, subjects with no smoking history and no respiratory disease | CT | >50% | 0% |
| Heussel et al. 20045 | Prospective, single centre | n=15, Life-long non-smokers, FEV1 >70% predicted | MRI | >50% | 33.3% |

**e-Table 4. Summary of 8 studies reporting the prevalence of large airway collapse in patients with chronic obstructive airway diseases (COPD or asthma)**

| **Study** | **Study design** | **Study subjects** | **Diagnostic modality** | **Diagnostic threshold for large airway collapse** | **Prevalence of large airway collapse** |
| --- | --- | --- | --- | --- | --- |
| Leong et al. 2017a1 | Prospective, single centre | n=40, stable outpatients with COPD | CT | >50% | 35% |
| Leong et al. 2017b1 | Prospective, single centre | n=64, hospitalized in patients with acute exacerbation of COPD | CT | >50% | 39% |
| Bhatt et al. 201611 | Retrospective multi centre | n=8820, ex or active smokers with COPD (43.7%) and asthma (16.6%). | CT | >50% | 5% |
| Sindhwani et al. 20166 | Prospective, single centre | n=25, patients with COPD or asthma (stable on medical management but having persistent wheezing) | CT | >50% | 40% |
| El Sorougi et al. 20167 | Prospective, single centre | n=30, patients with COPD | CT | >50% | 20% |
| Represas-Represas et al. 20158 | Prospective, single centre | n=53, patients with COPD | CT | >50% | 9.4% |
| Dal Negro et al. 20132 | Prospective, single centre | n=202, patients with asthma | Bronchoscopy | >50% | 41.1% |
| Boiselle et al. 201210 | Prospective, single centre | n=100, patients with COPD | CT | >80% | 20% |
| Heussel et al. 20045 | Prospective, single centre | n=38, patients with COPD | MRI | >50% | 69.6% |

**References**

1. Leong P, Tran A, Rangaswamy J, et al. Expiratory central airway collapse in stable COPD and during exacerbations. *Respir Res*. 2017;18(1):163.

2. Dal Negro R, Tognella S, Guerriero M, Micheletto C. Prevalence of tracheobronchomalacia and excessive dynamic airway collapse in bronchial asthma of different severity. *Multidiscip Respir Med*. 2013;8(1):32.

3. O'Donnell CR, Litmanovich D, Loring SH, Boiselle PM. Age and sex dependence of forced expiratory central airway collapse in healthy volunteers. *Chest*. 2012;142(1):168-174.

4. McDermott S, Barry SC, Judge EP, et al. Tracheomalacia in adults with cystic fibrosis: Determination of prevalence and severity with dynamic cine CT. *Radiology*. 2009;252(2):577-586.

5. Heussel CP, Ley S, Biedermann A, et al. Respiratory lumenal change of the pharynx and trachea in normal subjects and COPD patients: Assessment by cine-MRI. *Eur Radiol*. 2004;14(12):2188—2197.

6. Sindhwani G, Sodhi R, Saini M, Jethani V, Khanduri S, Singh B. Tracheobronchomalacia/excessive dynamic airway collapse in patients with chronic obstructive pulmonary disease with persistent expiratory wheeze: A pilot study. *Lung India*. 2016;33(4):381-384.

7. El Sorougi W, Abdel-Hafiz H, Fathy S. Diagnostic utility of dynamic CT in tracheomalacia in COPD patients. *Egyptian Journal of Chest Diseases and Tuberculosis*. 2016;65(3):563-566.

8. Represas-Represas C, Leiro-Fernández V, Mallo-Alonso R, Botana-Rial MI, Tilve-Gómez A, Fernández-Villar A. Excessive dynamic airway collapse in a small cohort of chronic obstructive pulmonary disease patients. *Ann Thorac Med*. 2015;10(2):118-122.

9. O'Donnell CR, Bankier AA, O'Donnell DH, Loring SH, Boiselle PM. Static end-expiratory and dynamic forced expiratory tracheal collapse in COPD. *Clin Radiol*. 2014;69(4):357-362.

10. Boiselle PM, Michaud G, Roberts DH, et al. Dynamic expiratory tracheal collapse in COPD: Correlation with clinical and physiologic parameters. *Chest*. 2012;142(6):1539-1544.

11. Bhatt SP, Terry NL, Nath H, et al. Association between expiratory central airway collapse and respiratory outcomes among smokers. *JAMA*. 2016;315(5):498-505.

stylefix
